# Supplementary figures and images for: Efficient photoreduction of carbon dioxide to ethanol using diatomic nitrogen-doped black phosphorus
Source: Royal Society of Chemistry journal article supplement (doi:10.1039/d3cp05275c), 2024-01-01

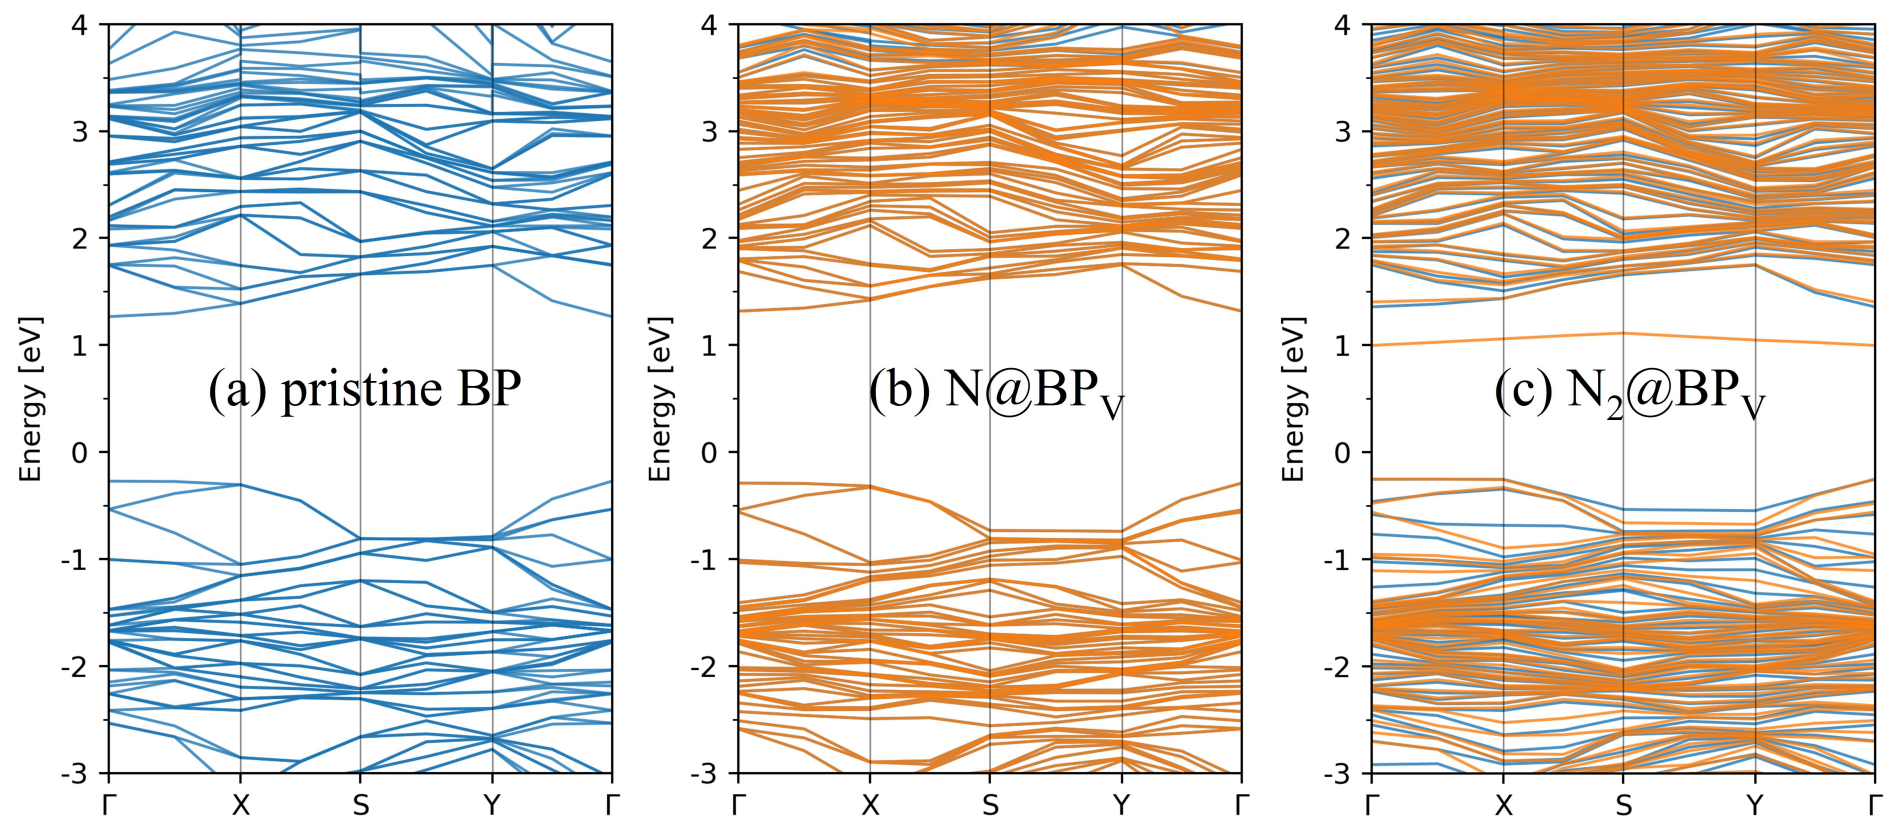

Supplement: d3cp05275c2.pdf [file d3cp05275c2.pdf]

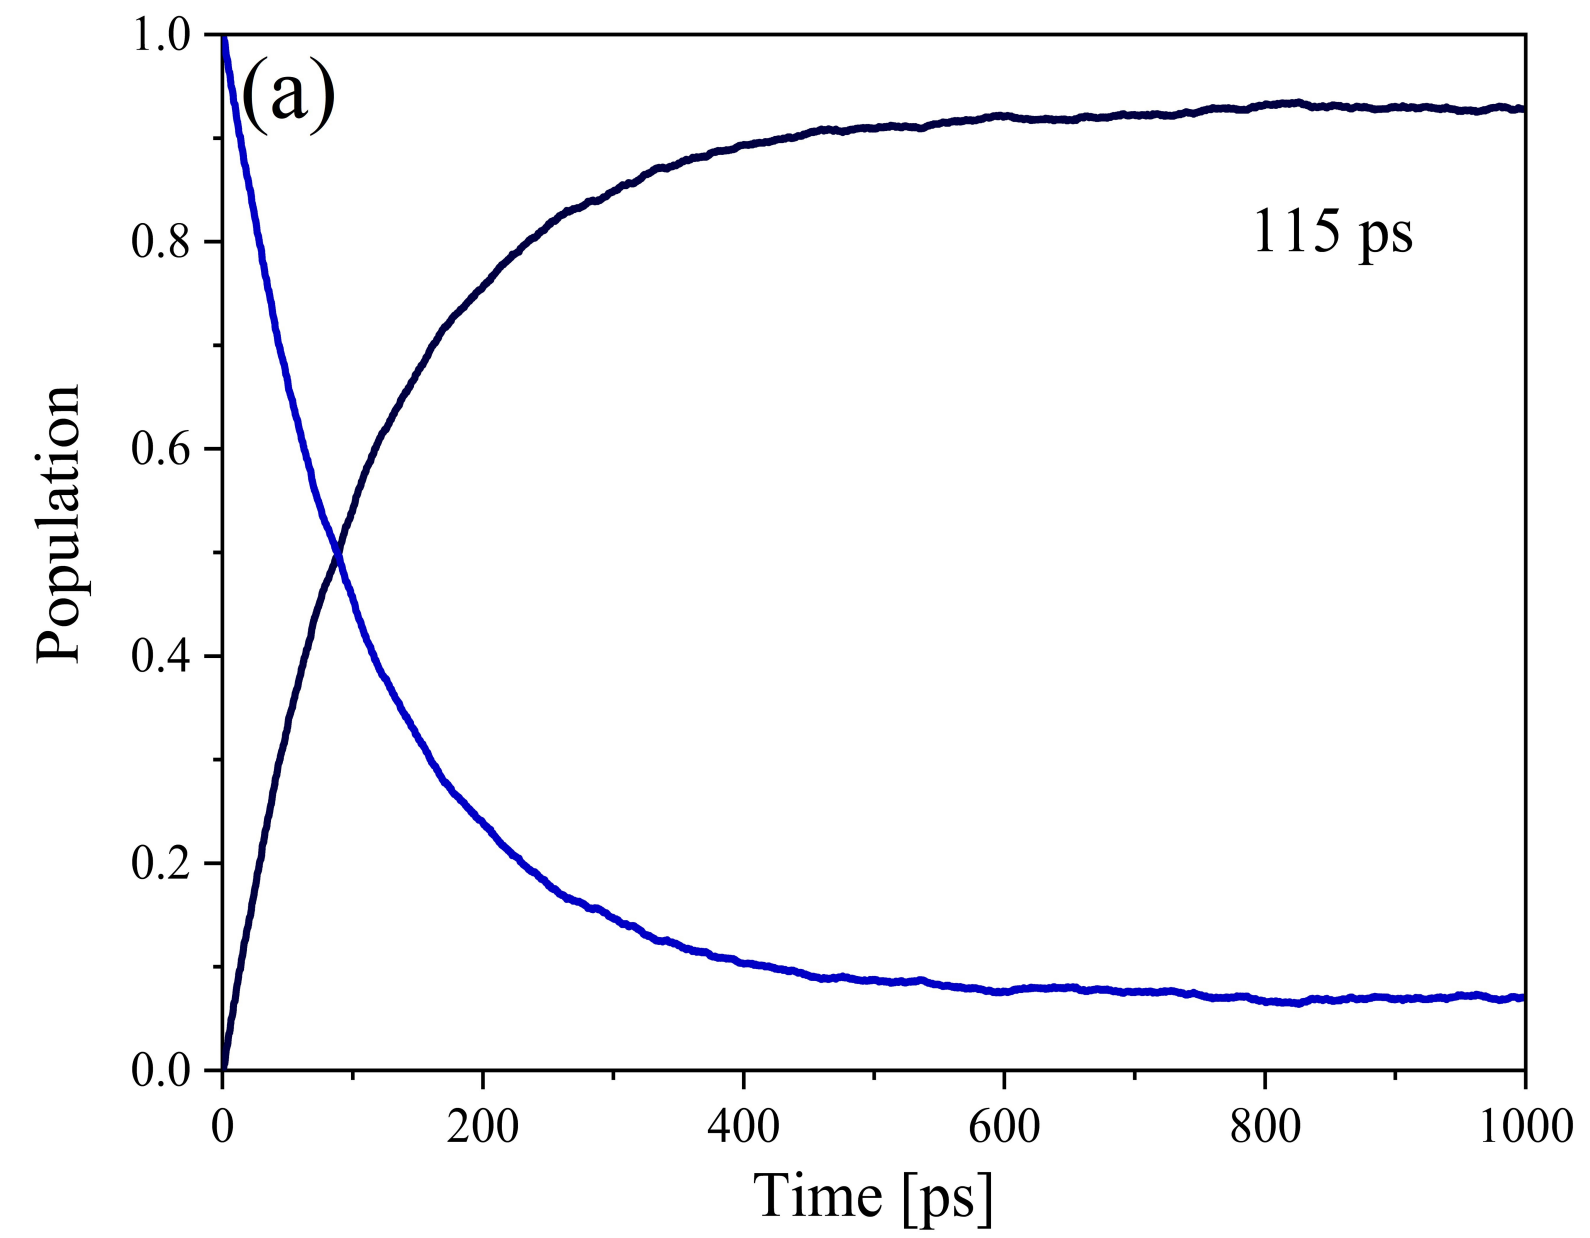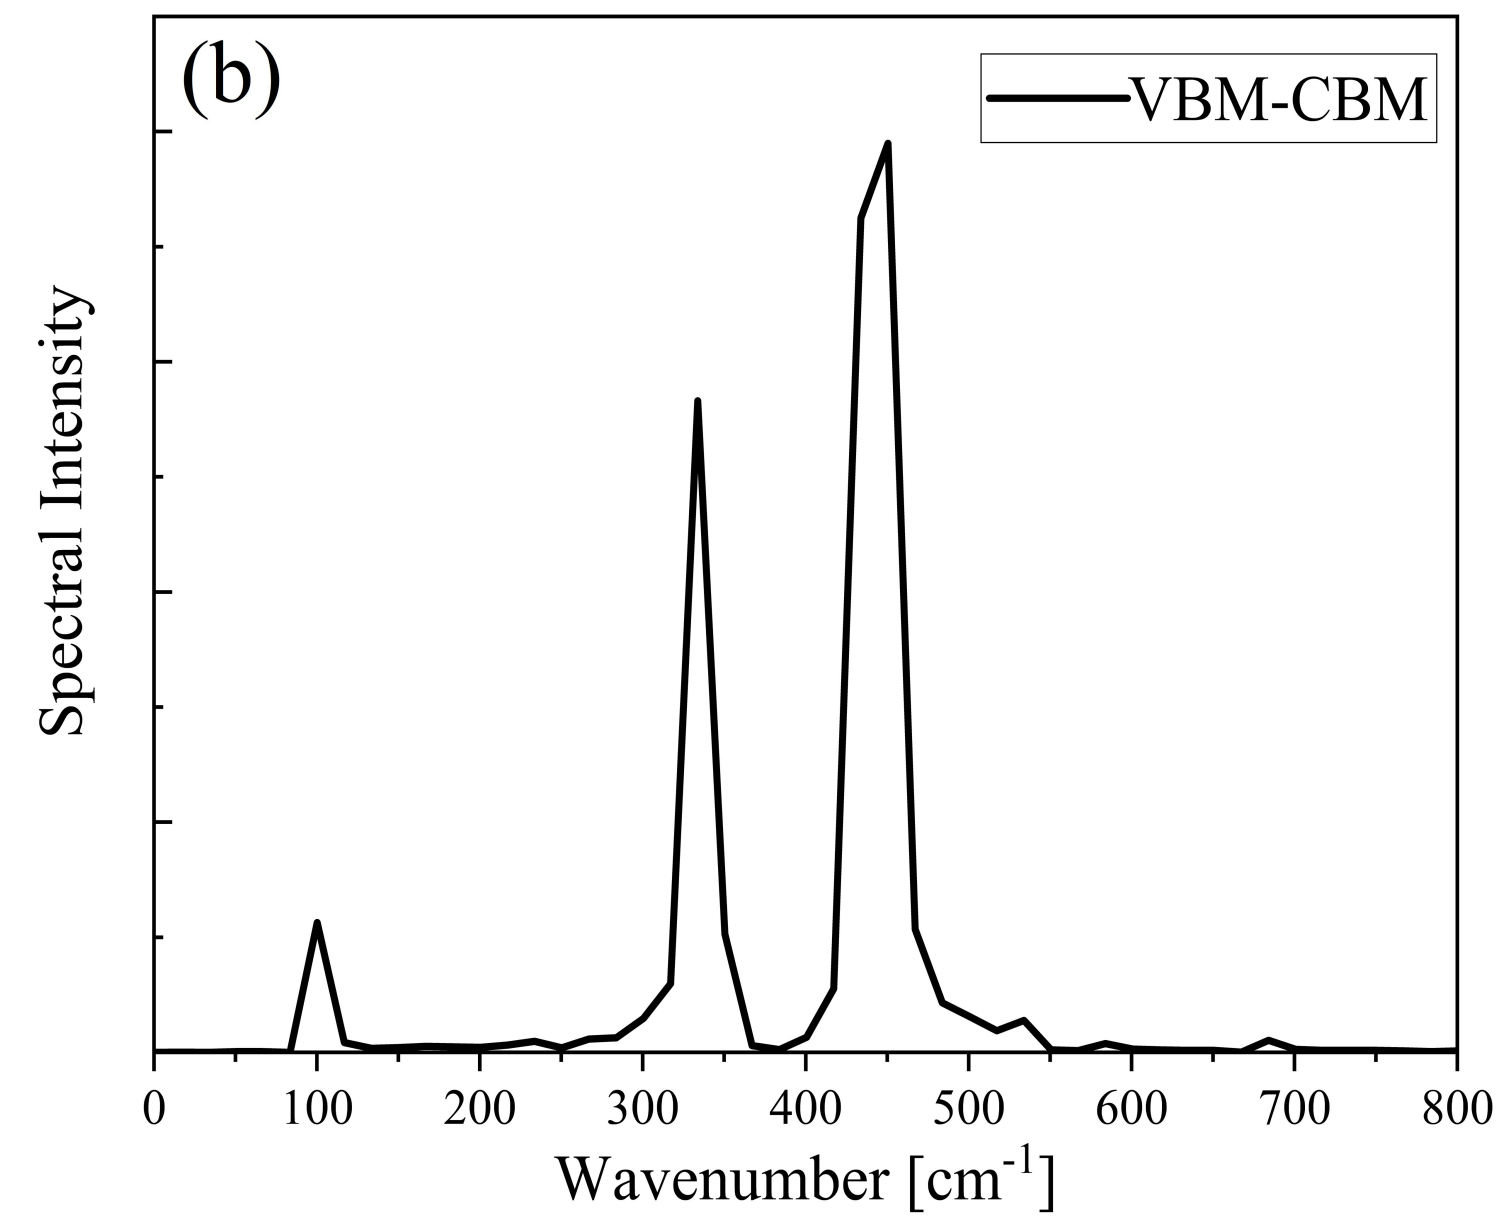

Supplement: d3cp05275c3.pdf [file d3cp05275c3.pdf]

(a)

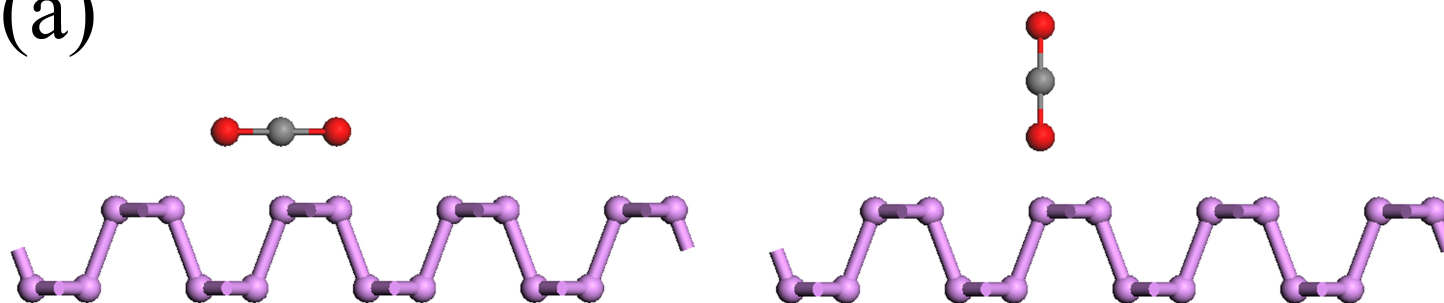

(b)

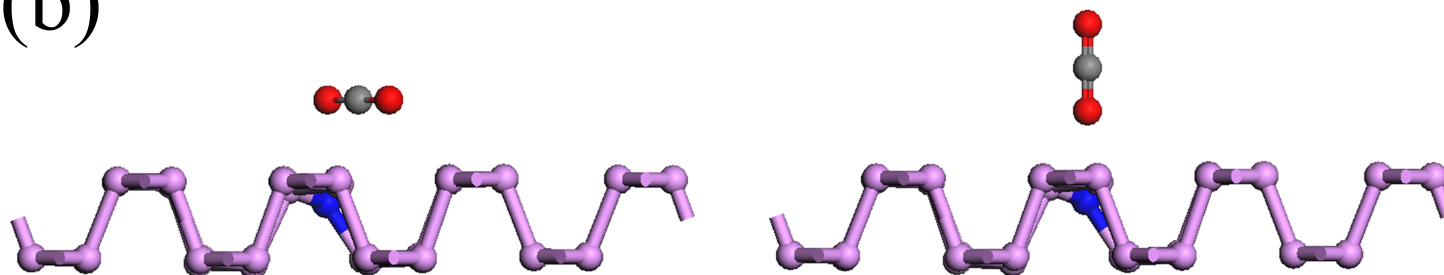

(c)

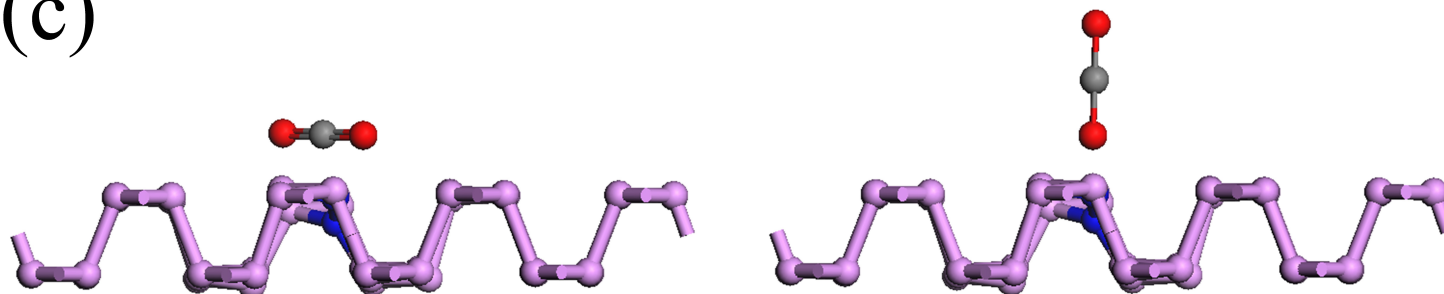

Supplement: d3cp05275c6.pdf [file d3cp05275c6.pdf]

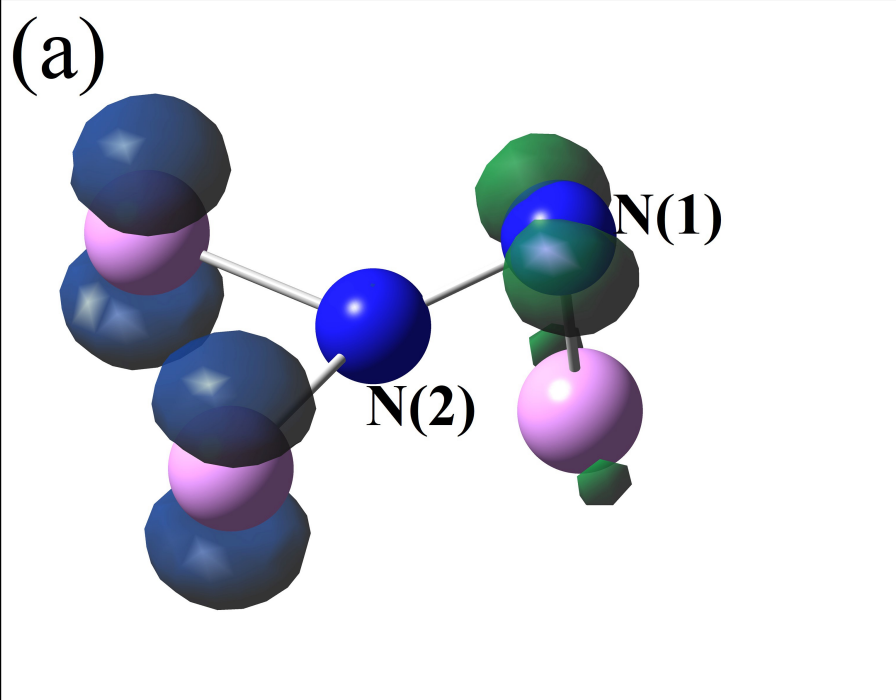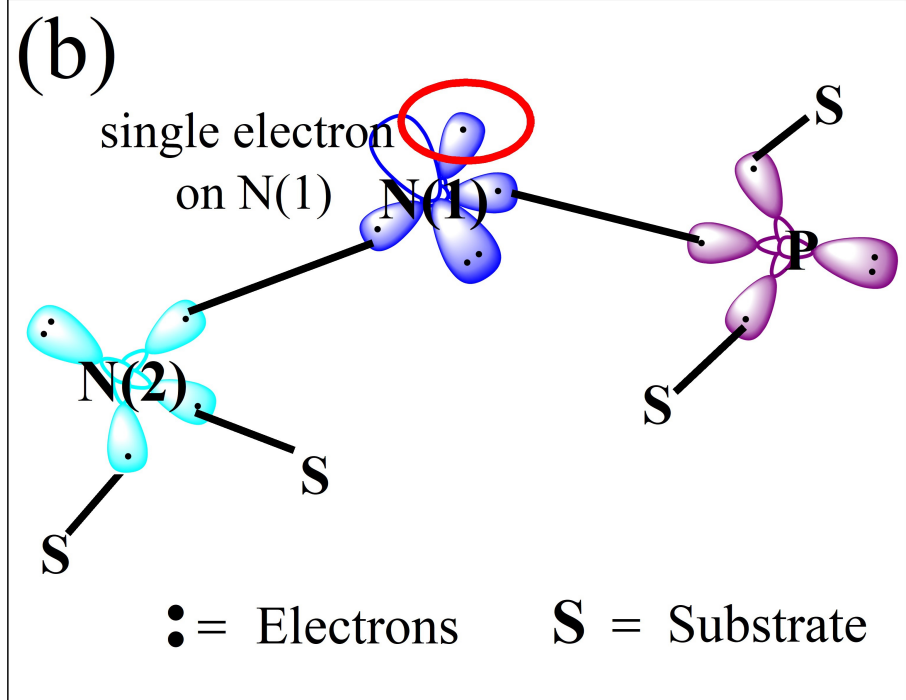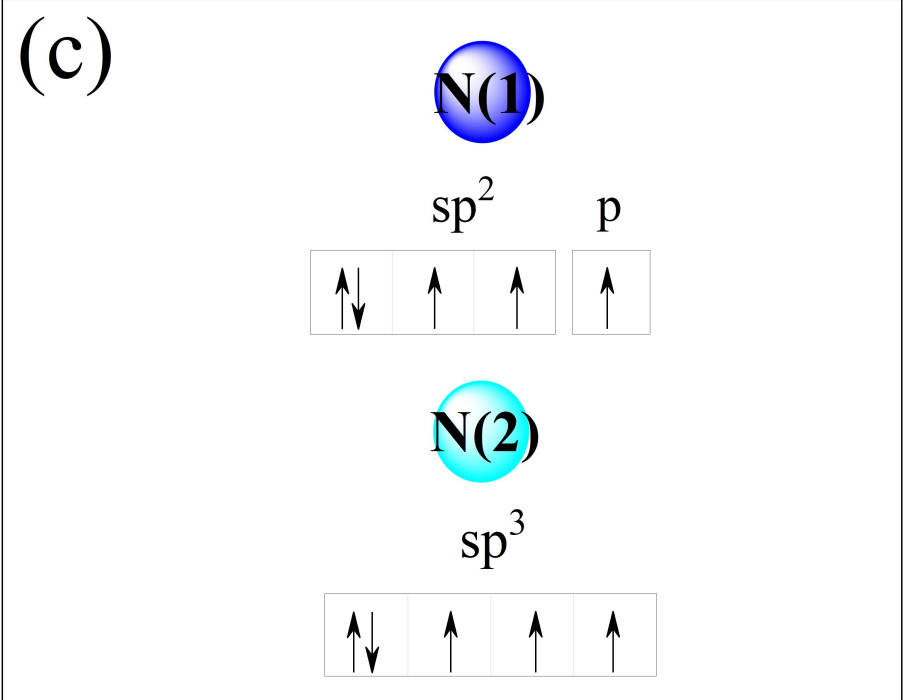

Supplement: d3cp05275c9.pdf [file d3cp05275c9.pdf]
